# Supplementary material for: Laboratory Evaluation of Indigenous and Commercial Entomopathogenic Nematodes against Red Palm Weevil, Rhynchophorus ferrugineus (Coleoptera: Curculionidae)
Source: MDPI journal article supplement (doi:10.3390/insects15040290), 2024-04-19
Supplement: s1 [file s1]

**Table S1.** Detailed information about the collection of soil samples to explore indigenous entomopathogenic nematode species from different regions in the Kingdom of Saudi Arabia.

| No | Province | City         | Vegetation type            | Soil Temp./RH | GPS                       |
|----|----------|--------------|----------------------------|---------------|---------------------------|
| 1  | Al Jouf  | Qariyat      | <i>Phoenix dactylifera</i> | 28°C/ 42%     | 31°17'19.6"N 37°22'20.2"E |
| 2  |          | Qariyat      | <i>Phoenix dactylifera</i> | 27°C/ 42%     | 31°17'52.6"N 37°21'58.2"E |
| 3  |          | Basita       | <i>Olea europaea</i>       | 28°C/ 48%     | 30°15'50.8"N 38°14'27.9"E |
| 4  |          | Basita       | <i>Olea europaea</i>       | 27°C/ 57%     | 30°15'50.8"N 38°14'27.9"E |
| 5  |          | Basita       | <i>Olea europaea</i>       | 26°C/ 60%     | 30°9'38.2"N 38°20'13.6"E  |
| 6  |          | Qariyat      | <i>Phoenix dactylifera</i> | 25°C/ 47%     | 31°16'46.2"N 37°22'20.2"E |
| 7  |          | Basita       | <i>Zea mays</i>            | 26°C/ 50%     | 30°15'50.8"N 38°14'27.9"E |
| 8  |          | Qariyat      | <i>Olea europaea</i>       | 28°C/ 40%     | 31°16'22.1"N 37°21'31"E   |
| 9  |          | Qariyat      | <i>Olea europaea</i>       | 28°C/ 54%     | 31°16'39.7"N 37°21'23.1"E |
| 10 | Tabuk    | Qaryat Ain   | <i>Punica granatum</i>     | 28°C/ 47%     | 27°38'16.5"N 36°49'14.2"E |
| 11 |          | An Nashifah  | <i>Phoenix dactylifera</i> | 28°C/ 60%     | 27°1'6.6"N 37°17'26.2"E   |
| 12 |          | Qaryat Ain   | <i>Phoenix dactylifera</i> | 29°C/ 45%     | 27°38'16.5"N 36°49'14.2"E |
| 13 |          | Qaryat Ain   | <i>Phoenix dactylifera</i> | 27°C/ 45%     | 27°38'16.4"N 36°49'9.4"E  |
| 14 |          | Qaryat Ain   | <i>Phoenix dactylifera</i> | 28°C/ 59%     | 27°38'16.5"N 36°49'14.2"E |
| 15 |          | An Nashifah  | <i>Phoenix dactylifera</i> | 29°C/ 60%     | 27°1'10.6"N 37°16'44.4"E  |
| 16 |          | Al Wajh      | <i>Phoenix dactylifera</i> | 28°C/ 60%     | 26°14'22.9"N 36°28'53.4"E |
| 17 |          | Al Umlaj     | <i>Phoenix dactylifera</i> | 27°C/ 40%     | 25°05'17.2"N 37°20'6.3"E  |
| 18 |          | Al Umlaj     | <i>Phoenix dactylifera</i> | 28°C/ 50%     | 25°01'56.9"N 37°20'6.6"E  |
| 19 |          | Al Umlaj     | <i>Mangifera indica</i>    | 27°C/ 50%     | 25°05'11.8"N 37°20'13.1"E |
| 20 |          | Al Umlaj     | <i>Mangifera indica</i>    | 28°C/ 47%     | 25°05'6.1"N 37°20'16.4"E  |
| 21 |          | Al Umlaj     | <i>Mangifera indica</i>    | 27°C/ 50%     | 25°05'6.1"N 37°20'16.4"E  |
| 22 |          | Al Umlaj     | Lemon                      | 28°C/ 60%     | 25°5'24.4"N 37°19'32.2"E  |
| 23 |          | Al Wajah     | <i>Phoenix dactylifera</i> | 28°C/ 60%     | 26°15'11.1"N 36°31'15.7"E |
| 24 | Madinah  | As Sovirqiya | <i>Phoenix dactylifera</i> | 26°C/ 60%     | 23°20'43.4"N 40°18'30.1"E |
| 25 |          | Al Faraa     | <i>Phoenix dactylifera</i> | 25°C/ 55%     | 24°58'8.2"N 38°02'54.5"E  |
| 26 |          | As Sovirqiya | <i>Phoenix dactylifera</i> | 28°C/ 40%     | 23°19'23.3"N 40°14'55.2"E |
| 27 |          | As Sovirqiya | <i>Phoenix dactylifera</i> | 30°C/ 43%     | 23°19'32.6"N 40°16'51.7"E |
| 28 |          | As Sovirqiya | <i>Phoenix dactylifera</i> | 29°C/ 47%     | 23°20'43.4"N 40°18'30.1"E |
| 29 |          | Bir al Mashi | <i>Phoenix dactylifera</i> | 30°C/ 52%     | 24°6'37.9"N 39°34'31.9"E  |
| 30 |          | As Sovirqiya | <i>Phoenix dactylifera</i> | 27°C/ 45%     | 23°19'23.3"N 40°14'55.2"E |
| 31 |          | As Sovirqiya | <i>Phoenix dactylifera</i> | 26°C/ 47%     | 23°18'59.6"N 40°15'21.6"E |
| 32 | Riyadh   | Huraymila    | <i>Phoenix dactylifera</i> | 30°C/ 40%     | 25°07'277"N 46°06'970"E   |
| 33 |          | Huraymila    | <i>Phoenix dactylifera</i> | 30°C/ 40%     | 25°07'307"N 46°06'110"E   |
